# Supplementary material for: Mucilage of Coccinia grandis as an Efficient Natural Polymer-Based Pharmaceutical Excipient
Source: MDPI journal article supplement (doi:10.3390/polym14010215), 2022-01-05
Supplement: s1 [file s1]

## **Supporting Information**

# **Mucilage of *Coccinia grandis* as an Efficient Natural Polymer-Based Pharmaceutical Excipient <sup>†</sup>**

Kumbakonam Balachandran Ilango <sup>1,\*</sup>, Senguttuvan Gowthaman <sup>1</sup>, Kumbakonam Ilango Seramaan <sup>2</sup>, Kumarappan Chidambaram <sup>3,\*</sup>, Mohammad F. Bayan <sup>4</sup>, Mohamed Rahamathulla <sup>5</sup> and Chandrasekaran Balakumar <sup>6</sup>

<sup>1</sup> Department of Pharmaceutics, College of Pharmacy, Shree Venkateshwara College of Paramedical Sciences, Erode 638455, Tamil Nadu, India; gowthamanpharma@gmail.com

<sup>2</sup> Department of Pharmaceutics, Vellalar College of Pharmacy, Erode 638012, Tamil Nadu, India; seramaan5435@gmail.com

<sup>3</sup> Department of Pharmacology, School of Pharmacy, King Khalid University, Abha 62529, Saudi Arabia

<sup>4</sup> Faculty of Pharmacy, Philadelphia University, P.O. Box 1, Amman 19392, Jordan; mbayan01@qub.ac.uk

<sup>5</sup> Department of Pharmaceutics, School of Pharmacy, King Khalid University, Abha 62529, Saudi Arabia; rahapharm@gmail.com

<sup>6</sup> Department of Pharmaceutical Chemistry, School of Pharmacy, ITM University, Gwalior 474001, Madhya Pradesh, India; dhillbalu@gmail.com

\* Correspondence: kbilango04@gmail.com (K.B.I.); kumarappan@kku.edu.sa (C.K.)

<sup>†</sup> Part of this work has been submitted as a thesis by S.G. to The TN Dr MGR Medical University, India.

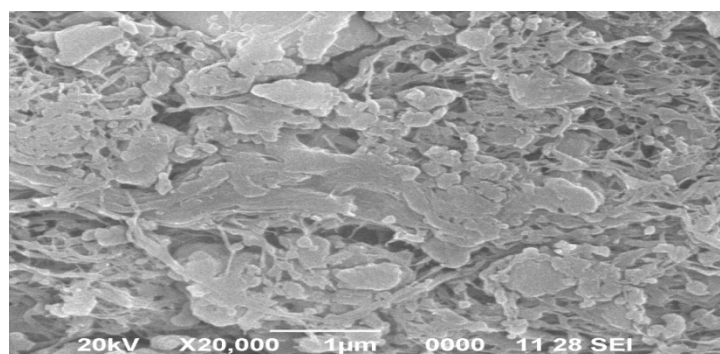

**Figure S1.** SEM analysis of mucilage in X20000.

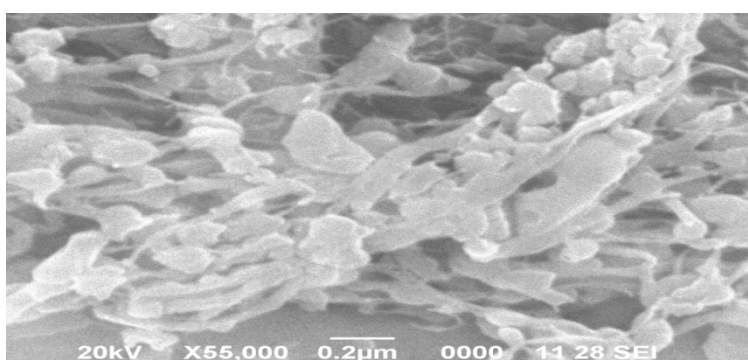

**Figure S2.** SEM analysis of mucilage in X55000.

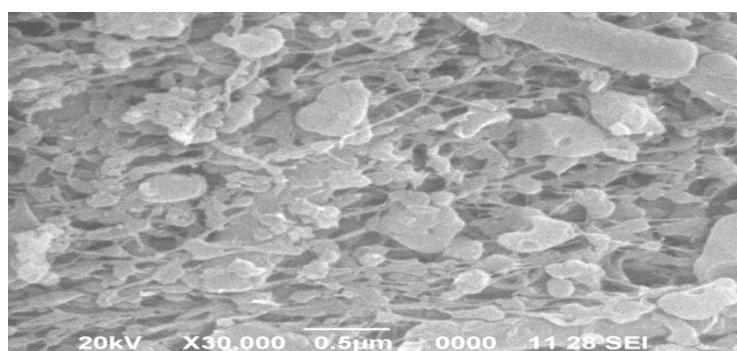

**Figure S3.** SEM analysis of mucilage in X30000.

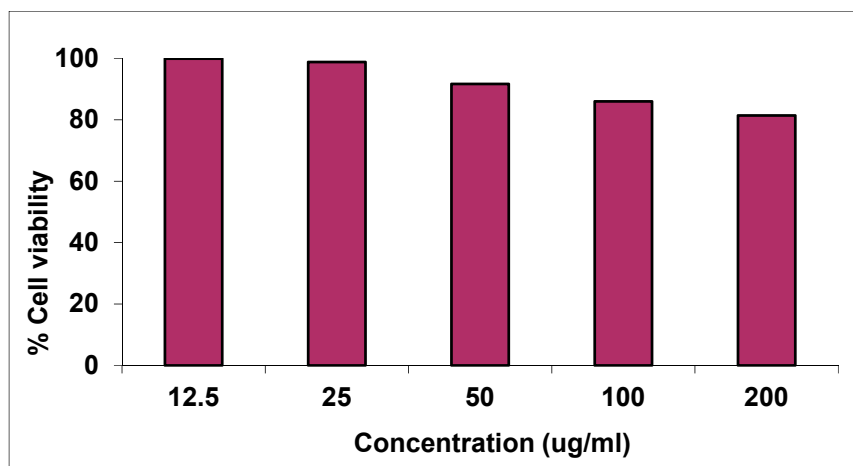

**Figure S4.** Graph of concentration vs % cell viability.

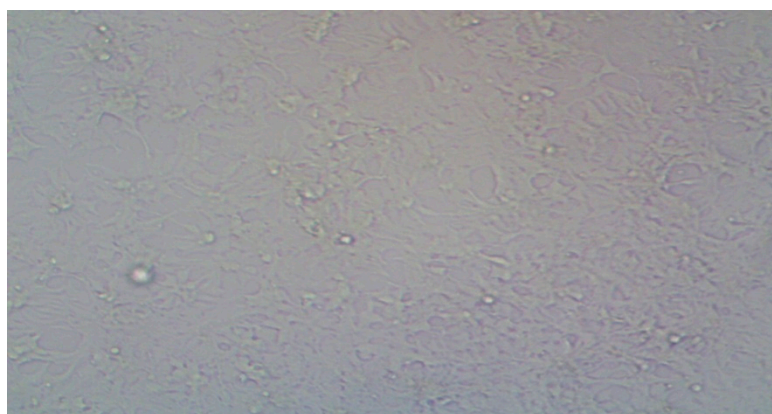

**Figure S5.** Image of cytototoxicity in 12.5 µg/ml.

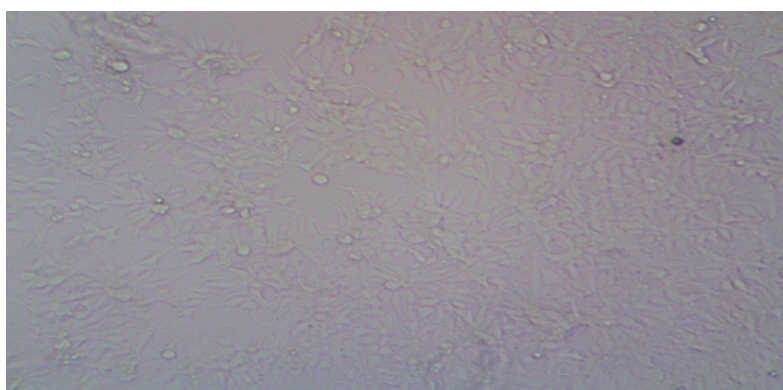

**Figure S6.** Image of cytototoxicity in 25 µg/ml.

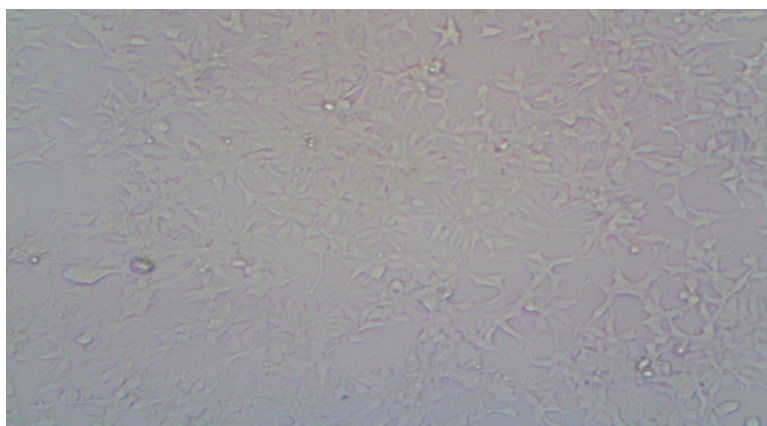

**Figure S7.** Image of cytotoxicity in 50  $\mu\text{g/ml}$ .

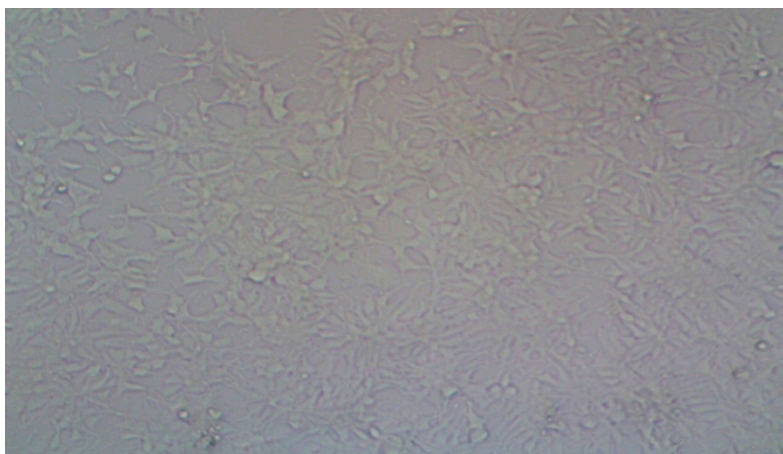

**Figure S8.** Image of cytotoxicity in 100  $\mu\text{g/ml}$ .

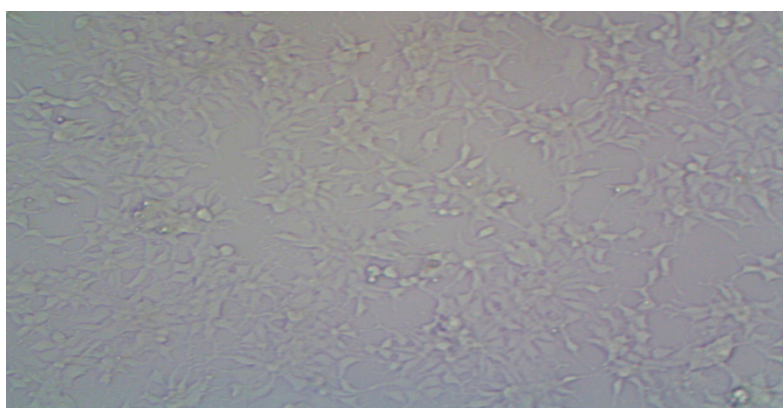

**Figure S9.** Image of cytotoxicity in 200  $\mu\text{g/ml}$ .

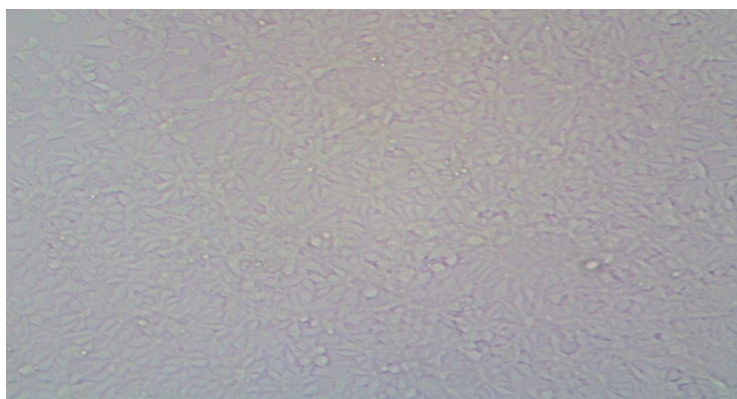

**Figure S10.** Image of cytotoxicity of control sample.

**Table S1.** Standard graph of paracetamol drug.

| Concentration ( $\mu\text{g/ml}$ ) | Absorbance (UV) |
|------------------------------------|-----------------|
| 0                                  | 0               |
| 2                                  | 0.096           |
| 4                                  | 0.206           |
| 6                                  | 0.305           |
| 8                                  | 0.410           |
| 10                                 | 0.513           |
| 12                                 | 0.618           |

**Table S2.** *In vitro* drug release of tablets using isolated mucilage and standard binders.

| Binders $\rightarrow$                   | CGM  |      |      | STARCH |      |      | PVP  |      |      |
|-----------------------------------------|------|------|------|--------|------|------|------|------|------|
| Formulations code $\rightarrow$         | F1   | F2   | F3   | F4     | F5   | F6   | F7   | F8   | F9   |
| Dissolution time<br>(mins) $\downarrow$ | (3%) | (6%) | (9%) | (3%)   | (6%) | (9%) | (3%) | (6%) | (9%) |
| 5                                       | 28.8 | 21.6 | 19.8 | 30.6   | 25.2 | 21.6 | 32.4 | 25.2 | 19.8 |
| 10                                      | 41.4 | 34.2 | 30.6 | 43.2   | 36.0 | 32.4 | 45.0 | 30.6 | 27.0 |
| 15                                      | 55.9 | 45.0 | 41.4 | 54.1   | 43.3 | 45.0 | 52.3 | 43.2 | 39.6 |
| 20                                      | 70.3 | 57.7 | 50.5 | 68.5   | 59.5 | 52.3 | 70.3 | 50.5 | 46.9 |
| 25                                      | 79.4 | 70.3 | 63.1 | 79.4   | 72.1 | 64.9 | 77.6 | 63.1 | 54.1 |
| 30                                      | 92.1 | 86.6 | 72.2 | 91.9   | 84.8 | 75.8 | 90.3 | 70.4 | 65.0 |

**Table S3.** *In vitro* drug release of tablets using isolated mucilage and standard disintegrants.

| <b>Disintegrants</b> →                     | <b>CGM</b>  |             | <b>MCCP</b> |             | <b>CCS</b>  |             | <b>SSG</b>  |             |
|--------------------------------------------|-------------|-------------|-------------|-------------|-------------|-------------|-------------|-------------|
| <b>Formulations code</b> →                 | <b>G1</b>   | <b>G2</b>   | <b>G3</b>   | <b>G4</b>   | <b>G5</b>   | <b>G6</b>   | <b>G7</b>   | <b>G8</b>   |
| <b>Dissolution time</b><br><b>(mins) ↓</b> | <b>(2%)</b> | <b>(3%)</b> | <b>(2%)</b> | <b>(3%)</b> | <b>(2%)</b> | <b>(3%)</b> | <b>(2%)</b> | <b>(3%)</b> |
| 5                                          | 28.8        | 30.6        | 28.8        | 29.0        | 30.6        | 32.4        | 30.6        | 28.8        |
| 10                                         | 39.6        | 39.6        | 37.8        | 41.4        | 41.4        | 41.4        | 39.6        | 41.4        |
| 15                                         | 54.1        | 54.1        | 55.8        | 54.0        | 52.3        | 54.1        | 54.0        | 54.1        |
| 20                                         | 66.7        | 68.5        | 66.7        | 68.5        | 66.7        | 68.5        | 66.7        | 68.5        |
| 25                                         | 79.4        | 79.4        | 77.6        | 79.4        | 81.2        | 81.2        | 77.6        | 79.4        |
| 30                                         | 90.3        | 92.1        | 88.5        | 90.2        | 90.3        | 93.9        | 90.3        | 92.1        |

-----
